# Supplementary material for: Mg–Al LDH nanosheets as a nanotechnological tool in agriculture: an exploratory toxicity evaluation study
Source: Royal Society of Chemistry journal article supplement (doi:10.1039/d3en00733b), 2024-01-01
Supplement: d3en00733b1.pdf [file d3en00733b1.pdf]

### Supplementary Information

#### **Mg-Al LDH nanosheets as a nanotechnological tool in agriculture: An exploratory toxicity evaluation study**

Rafael Salinas-Jiménez<sup>a,b,†</sup>, Gloria Vera<sup>a,b,†</sup>, Mariola Tobar<sup>b,c,†</sup>, Jeimy Moscote<sup>b,c</sup>, Giovana Acha<sup>b</sup>, Ariel Herrera-Vásquez<sup>c,d</sup>, Diego Rojas-Rivera<sup>e,f</sup>, Elena A. Vidal<sup>b,c,f</sup>, Andrea Miyasaka Almeida<sup>b,g,\*</sup>, Manuel Ahumada<sup>a,f,\*</sup>

<sup>a</sup>Centro de Nanotecnología Aplicada, Facultad de Ciencias, Ingeniería y Tecnología, Universidad Mayor, Santiago 8580745, Chile

<sup>b</sup>Centro de Genómica y Bioinformática, Facultad de Ciencias, Ingeniería y Tecnología, Universidad Mayor, Santiago 8580745, Chile

<sup>c</sup>ANID-Millennium Science Initiative Program-Millennium Institute for Integrative Biology (iBio), Santiago 8331150, Chile

<sup>d</sup>Centro de Biotecnología Vegetal, Facultad de Ciencias de la Vida, Universidad Andrés Bello, Santiago 8370146, Chile

<sup>e</sup>Laboratorio de Muerte Celular y Biomedicina, Vicerrectoría de Investigación, Universidad Mayor, Santiago 8580745, Chile

<sup>f</sup>Escuela de Biotecnología, Facultad de Ciencias, Ingeniería y Tecnología, Universidad Mayor, Santiago 8580745, Chile

<sup>g</sup>Escuela de Agronomía, Facultad de Ciencias, Ingeniería y Tecnología, Universidad Mayor, Santiago 8580745, Chile

† Denotes equal contributions.

**Corresponding author's emails:** [andrea.miyasaka@umayor.cl](mailto:andrea.miyasaka@umayor.cl); [manuel.ahumada@umayor.cl](mailto:manuel.ahumada@umayor.cl)

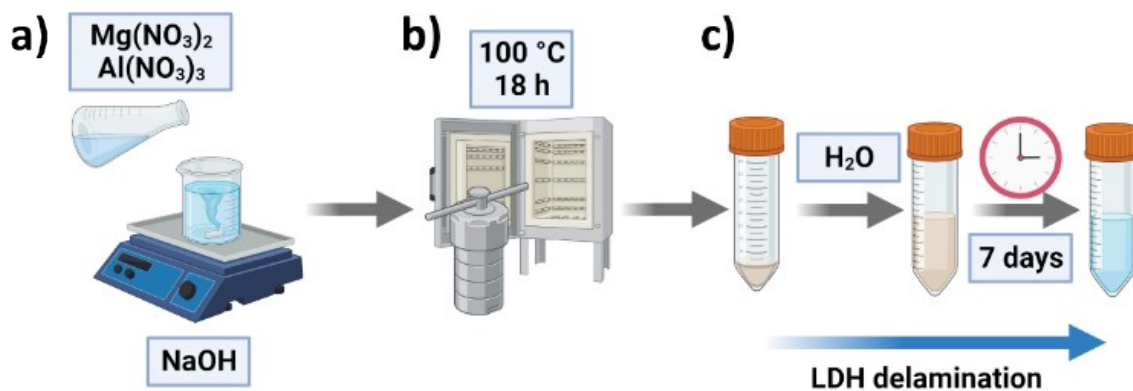

**Figure S1.** Schematic representation of the followed protocol used in this work. a) LDH nanosheets were prepared by co-precipitation method followed by b) a hydrothermal treatment. Posteriorly, c) LDH purification was performed using several centrifuge and water resuspension cycles.

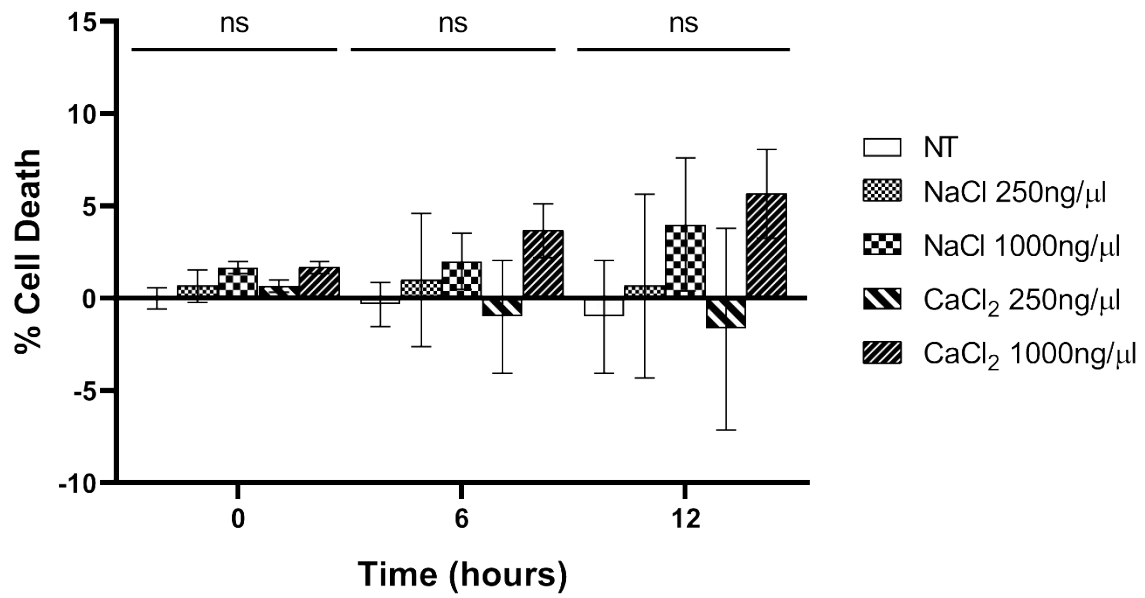

**Figure S2.** Effect of ionic solutions of NaCl and CaCl<sub>2</sub> in *A. thaliana* protoplast in the absence (NT) and presence of NaCl and CaCl<sub>2</sub> at concentrations of 250 ng/μL and 1000 ng/μL. Statistical significance was calculated using two-way ANOVA with Dunnett's multiple comparisons test, being non-significant within the times evaluated. The values shown are means with SEM of three independent sets of experiments.

**Table S1.** Dunnett’s multiple comparisons test. Within each time point, a comparison in different concentrations of NaCl and CaCl<sub>2</sub>. The “Summary” column indicates the conclusion about the significance of the data, with “ns” having no significance and “\*” as a p-value < 0.05.

| Within each row, compare columns (simple effects within rows) |            |                    |              |         |                  |   |
|---------------------------------------------------------------|------------|--------------------|--------------|---------|------------------|---|
| Number of families                                            | 3          |                    |              |         |                  |   |
| Number of comparisons per family                              | 4          |                    |              |         |                  |   |
| Alpha                                                         | 0,05       |                    |              |         |                  |   |
| Dunnett's multiple comparisons test                           | Mean Diff, | 95,00% CI of diff, | Significant? | Summary | Adjusted P Value | P |
| 0 hrs                                                         |            |                    |              |         |                  |   |
| NT vs. NaCl 250ng/μl                                          | -0,6667    | -5,009 to 3,676    | No           | ns      | 0,7434           |   |
| NT vs. NaCl 1000ng/μl                                         | -1,667     | -6,009 to 2,676    | No           | ns      | 0,271            |   |
| NT vs. CaCl <sub>2</sub> 250ng/μl                             | -0,6667    | -6,411 to 5,078    | No           | ns      | 0,8566           |   |
| NT vs. CaCl <sub>2</sub> 1000ng/μl                            | -1,667     | -6,009 to 2,676    | No           | ns      | 0,271            |   |
| 6 hrs                                                         |            |                    |              |         |                  |   |
| NT vs. NaCl 250ng/μl                                          | -1,333     | -18,29 to 15,62    | No           | ns      | 0,9485           |   |
| NT vs. NaCl 1000ng/μl                                         | -2,333     | -11,02 to 6,351    | No           | ns      | 0,443            |   |
| NT vs. CaCl <sub>2</sub> 250ng/μl                             | 0,6667     | -11,42 to 12,75    | No           | ns      | 0,9832           |   |
| NT vs. CaCl <sub>2</sub> 1000ng/μl                            | -4         | -13,95 to 5,949    | No           | ns      | 0,2524           |   |
| 12 hrs                                                        |            |                    |              |         |                  |   |
| NT vs. NaCl 250ng/μl                                          | -1,667     | -20,22 to 16,88    | No           | ns      | 0,925            |   |
| NT vs. NaCl 1000ng/μl                                         | -5         | -27,87 to 17,87    | No           | ns      | 0,5571           |   |
| NT vs. CaCl <sub>2</sub> 250ng/μl                             | 0,6667     | -14,99 to 16,32    | No           | ns      | 0,9932           |   |
| NT vs. CaCl <sub>2</sub> 1000ng/μl                            | -6,667     | -18,16 to 4,822    | No           | ns      | 0,1368           |   |

**Table S2.** Dunnett’s multiple comparisons test. Within each concentration, a comparison of the different time points effect. The “Summary” column indicates the conclusion about the significance of the data, with “ns” having no significance and “\*” as a p-value < 0.05.

| Within each column, compare rows (simple effects within columns) |            |                     |              |         |                  |
|------------------------------------------------------------------|------------|---------------------|--------------|---------|------------------|
| Number of families                                               | 6          |                     |              |         |                  |
| Number of comparisons per family                                 | 4          |                     |              |         |                  |
| Alpha                                                            | 0,05       |                     |              |         |                  |
| Dunnett's multiple comparisons test                              | Mean Diff, | 95,00% CI of diff,  | Significant? | Summary | Adjusted P Value |
| <b>0 ng/μl</b>                                                   |            |                     |              |         |                  |
| 0 hrs vs. 6 hrs                                                  | -0,05824   | -2,527 to 2,411     | No           | ns      | 0,9415           |
| 0 hrs vs. 12 hrs                                                 | -0,1966    | -5,171 to 4,778     | No           | ns      | 0,8182           |
| 0 hrs vs. 18 hrs                                                 | -0,2448    | -6,595 to 6,105     | No           | ns      | 0,8263           |
| 0 hrs vs. 24 hrs                                                 | -0,2456    | -6,572 to 6,081     | No           | ns      | 0,8240           |
| <b>25 ng/μl</b>                                                  |            |                     |              |         |                  |
| 0 hrs vs. 6 hrs                                                  | -0,1827    | -0,7525 to 0,3872   | No           | ns      | 0,3522           |
| 0 hrs vs. 12 hrs                                                 | -0,2476    | -0,7107 to 0,2155   | No           | ns      | 0,1578           |
| 0 hrs vs. 18 hrs                                                 | -0,3175    | -0,9127 to 0,2777   | No           | ns      | 0,1584           |
| 0 hrs vs. 24 hrs                                                 | -0,3973    | -1,032 to 0,2369    | No           | ns      | 0,1194           |
| <b>250 ng/μl</b>                                                 |            |                     |              |         |                  |
| 0 hrs vs. 6 hrs                                                  | -0,1059    | -0,1839 to -0,02795 | Yes          | *       | 0,0277           |
| 0 hrs vs. 12 hrs                                                 | -0,05913   | -0,1633 to 0,04504  | No           | ns      | 0,1422           |
| 0 hrs vs. 18 hrs                                                 | -0,03455   | -0,3249 to 0,2558   | No           | ns      | 0,8481           |
| 0 hrs vs. 24 hrs                                                 | -0,06854   | -0,2928 to 0,1557   | No           | ns      | 0,3758           |
| <b>500 ng/μl</b>                                                 |            |                     |              |         |                  |
| 0 hrs vs. 6 hrs                                                  | -0,1663    | -0,4723 to 0,1397   | No           | ns      | 0,1534           |
| 0 hrs vs. 12 hrs                                                 | -0,2386    | -0,5825 to 0,1053   | No           | ns      | 0,0992           |
| 0 hrs vs. 18 hrs                                                 | -0,2621    | -0,7317 to 0,2076   | No           | ns      | 0,1465           |
| 0 hrs vs. 24 hrs                                                 | -0,3032    | -0,7390 to 0,1325   | No           | ns      | 0,0987           |
| <b>750 ng/μl</b>                                                 |            |                     |              |         |                  |
| 0 hrs vs. 6 hrs                                                  | -0,2206    | -0,5251 to 0,08397  | No           | ns      | 0,0917           |
| 0 hrs vs. 12 hrs                                                 | -0,2609    | -0,5528 to 0,03095  | No           | ns      | 0,0619           |
| 0 hrs vs. 18 hrs                                                 | -0,2546    | -0,5486 to 0,03945  | No           | ns      | 0,0657           |
| 0 hrs vs. 24 hrs                                                 | -0,2522    | -0,5724 to 0,06809  | No           | ns      | 0,0785           |
| <b>1000 ng/μl</b>                                                |            |                     |              |         |                  |
| 0 hrs vs. 6 hrs                                                  | -0,3028    | -0,5600 to -0,04568 | Yes          | *       | 0,0365           |
| 0 hrs vs. 12 hrs                                                 | -0,3307    | -0,5301 to -0,1313  | Yes          | *       | 0,0187           |
| 0 hrs vs. 18 hrs                                                 | -0,3107    | -0,5085 to -0,1130  | Yes          | *       | 0,0208           |
| 0 hrs vs. 24 hrs                                                 | -0,2923    | -0,4538 to -0,1308  | Yes          | *       | 0,0158           |

**Table S3.** Two-way ANOVA of concentrations and time exposure of Mg-Al LDH treatments on protoplast cell death. “Summary” column indicates the conclusion about significance of data, with “ns” a no significant, “\*” as p-value < 0.05, “\*\*\*” as p-value <0.01 and “\*\*\*\*” as p-value < 0.0001.

|                                   |                            |         |                 |                          |                              |
|-----------------------------------|----------------------------|---------|-----------------|--------------------------|------------------------------|
| Table Analyzed                    | Transform of Data (log(Y)) |         |                 |                          |                              |
| Two-way RM ANOVA                  | Matching: Stacked          |         |                 |                          |                              |
| Assume sphericity?                | No                         |         |                 |                          |                              |
| Alpha                             | 0,05                       |         |                 |                          |                              |
| Source of Variation               | % of total variation       | P value | P value summary | Significant?             | Geisser-Greenhouse's epsilon |
| Interaction                       | 3,550                      | 0,0293  | *               | Yes                      |                              |
| Time                              | 13,13                      | <0,0001 | ****            | Yes                      | 0,3208                       |
| Concentration                     | 56,46                      | 0,0088  | **              | Yes                      |                              |
| Subject                           | 22,56                      | <0,0001 | ****            | Yes                      |                              |
| ANOVA table                       | SS                         | DF      | MS              | F (DFn, DFd)             | P value                      |
| Interaction                       | 0,1972                     | 20      | 0,009862        | F (20, 44) = 1,983       | P=0,0293                     |
| Time                              | 0,7293                     | 4       | 0,1823          | F (1,283, 14,11) = 36,67 | P<0,0001                     |
| Concentration                     | 3,137                      | 5       | 0,6274          | F (5, 11) = 5,506        | P=0,0088                     |
| Subject                           | 1,254                      | 11      | 0,1140          | F (11, 44) = 22,92       | P<0,0001                     |
| Residual                          | 0,2188                     | 44      | 0,004972        |                          |                              |
| Data summary                      |                            |         |                 |                          |                              |
| Number of columns (Concentration) | 6                          |         |                 |                          |                              |
| Number of rows (Time)             | 5                          |         |                 |                          |                              |
| Number of subjects (Subject)      | 17                         |         |                 |                          |                              |

**Table S4.** Dunnett’s multiple comparisons test. Within each time point, a comparison in different concentrations. The “Summary” column indicates the conclusion about the significance of the data, with “ns” having no significance and “\*” as a p-value < 0.05.

| Within each row, compare columns (simple effects within rows) |            |                    |              |         |                  |
|---------------------------------------------------------------|------------|--------------------|--------------|---------|------------------|
| Number of families                                            | 5          |                    |              |         |                  |
| Number of comparisons per family                              | 5          |                    |              |         |                  |
| Alpha                                                         | 0,05       |                    |              |         |                  |
| Dunnett's multiple comparisons test                           | Mean Diff, | 95,00% CI of diff, | Significant? | Summary | Adjusted P Value |
| <b>0 hrs</b>                                                  |            |                    |              |         |                  |
| 0 ng/µl vs. 25 ng/µl                                          | 0,2131     | -6,791 to 7,217    | No           | ns      | >0,9999          |
| 0 ng/µl vs. 250 ng/µl                                         | -0,03705   | -6,933 to 6,858    | No           | ns      | >0,9999          |
| 0 ng/µl vs. 500 ng/µl                                         | -0,1652    | -7,429 to 7,099    | No           | ns      | >0,9999          |
| 0 ng/µl vs. 750 ng/µl                                         | -0,2787    | -8,415 to 7,858    | No           | ns      | >0,9999          |
| 0 ng/µl vs. 1000 ng/µl                                        | -0,2511    | -8,018 to 7,516    | No           | ns      | >0,9999          |
| <b>6 hrs</b>                                                  |            |                    |              |         |                  |
| 0 ng/µl vs. 25 ng/µl                                          | 0,08863    | -5,980 to 6,157    | No           | ns      | >0,9999          |
| 0 ng/µl vs. 250 ng/µl                                         | -0,08473   | -4,424 to 4,255    | No           | ns      | 0,9932           |
| 0 ng/µl vs. 500 ng/µl                                         | -0,2732    | -3,708 to 3,162    | No           | ns      | 0,8071           |
| 0 ng/µl vs. 750 ng/µl                                         | -0,4410    | -5,357 to 4,475    | No           | ns      | >0,9999          |
| 0 ng/µl vs. 1000 ng/µl                                        | -0,4957    | -4,954 to 3,963    | No           | ns      | 0,5374           |
| <b>12 hrs</b>                                                 |            |                    |              |         |                  |
| 0 ng/µl vs. 25 ng/µl                                          | 0,1621     | -2,598 to 2,923    | No           | ns      | 0,7874           |
| 0 ng/µl vs. 250 ng/µl                                         | 0,1004     | -1,632 to 1,833    | No           | ns      | 0,9437           |
| 0 ng/µl vs. 500 ng/µl                                         | -0,2072    | -1,532 to 1,117    | No           | ns      | 0,7377           |
| 0 ng/µl vs. 750 ng/µl                                         | -0,3430    | -2,754 to 2,068    | No           | ns      | 0,4624           |
| 0 ng/µl vs. 1000 ng/µl                                        | -0,3852    | -2,414 to 1,644    | No           | ns      | 0,4062           |
| <b>18 hrs</b>                                                 |            |                    |              |         |                  |
| 0 ng/µl vs. 25 ng/µl                                          | 0,1404     | -0,7398 to 1,021   | No           | ns      | 0,6722           |
| 0 ng/µl vs. 250 ng/µl                                         | 0,1732     | -0,6156 to 0,9619  | No           | ns      | 0,5742           |
| 0 ng/µl vs. 500 ng/µl                                         | -0,1824    | -0,9255 to 0,5606  | No           | ns      | 0,6770           |
| 0 ng/µl vs. 750 ng/µl                                         | -0,2884    | -1,371 to 0,7936   | No           | ns      | 0,3159           |
| 0 ng/µl vs. 1000 ng/µl                                        | -0,3171    | -1,169 to 0,5352   | No           | ns      | 0,2642           |
| <b>24 hrs</b>                                                 |            |                    |              |         |                  |
| 0 ng/µl vs. 25 ng/µl                                          | 0,06138    | -0,9456 to 1,068   | No           | ns      | 0,9484           |
| 0 ng/µl vs. 250 ng/µl                                         | 0,1400     | -0,6544 to 0,9345  | No           | ns      | 0,6988           |
| 0 ng/µl vs. 500 ng/µl                                         | -0,2228    | -0,9770 to 0,5315  | No           | ns      | 0,5630           |
| 0 ng/µl vs. 750 ng/µl                                         | -0,2852    | -1,220 to 0,6494   | No           | ns      | 0,3158           |
| 0 ng/µl vs. 1000 ng/µl                                        | -0,2978    | -1,136 to 0,5400   | No           | ns      | 0,2932           |

**Table S5.** Dunnett’s multiple comparisons test of different Mg-Al LDH concentrations. The “Summary” column indicates the conclusion about the significance of the data, with “ns” having no significance and “\*” as a p-value < 0.05.

|                                     |            |                    |              |             |                  |     |               |    |
|-------------------------------------|------------|--------------------|--------------|-------------|------------------|-----|---------------|----|
| Number of families                  | 1          |                    |              |             |                  |     |               |    |
| Number of comparisons per family    | 5          |                    |              |             |                  |     |               |    |
| Alpha                               | 0,05       |                    |              |             |                  |     |               |    |
| Dunnett's multiple comparisons test | Mean Diff, | 95,00% CI of diff, | Significant? | Summary     | Adjusted P Value | A-? |               |    |
| 0 ng/μl vs. 25 ng/μl                | -2,321     | -25,59 to 20,95    | No           | ns          | 0,9983           | B   | 25<br>ng/μl   |    |
| 0 ng/μl vs. 250 ng/μl               | -7,509     | -30,78 to 15,76    | No           | ns          | 0,8128           | C   | 250<br>ng/μl  |    |
| 0 ng/μl vs. 500 ng/μl               | -16,21     | -39,48 to 7,065    | No           | ns          | 0,2186           | D   | 500<br>ng/μl  |    |
| 0 ng/μl vs. 750 ng/μl               | -25,62     | -48,90 to -2,350   | Yes          | *           | 0,0298           | E   | 750<br>ng/μl  |    |
| 0 ng/μl vs. 1000 ng/μl              | -30,45     | -53,73 to -7,179   | Yes          | *           | 0,0103           | F   | 1000<br>ng/μl |    |
| Test details                        | Mean 1     | Mean 2             | Mean Diff,   | SE of diff, | n1               | n2  | q             | DF |
| 0 ng/μl vs. 25 ng/μl                | 7,153      | 9,474              | -2,321       | 8,022       | 3                | 3   | 0,2894        | 12 |
| 0 ng/μl vs. 250 ng/μl               | 7,153      | 14,66              | -7,509       | 8,022       | 3                | 3   | 0,9360        | 12 |
| 0 ng/μl vs. 500 ng/μl               | 7,153      | 23,36              | -16,21       | 8,022       | 3                | 3   | 2,021         | 12 |
| 0 ng/μl vs. 750 ng/μl               | 7,153      | 32,78              | -25,62       | 8,022       | 3                | 3   | 3,194         | 12 |
| 0 ng/μl vs. 1000 ng/μl              | 7,153      | 37,61              | -30,45       | 8,022       | 3                | 3   | 3,796         | 12 |



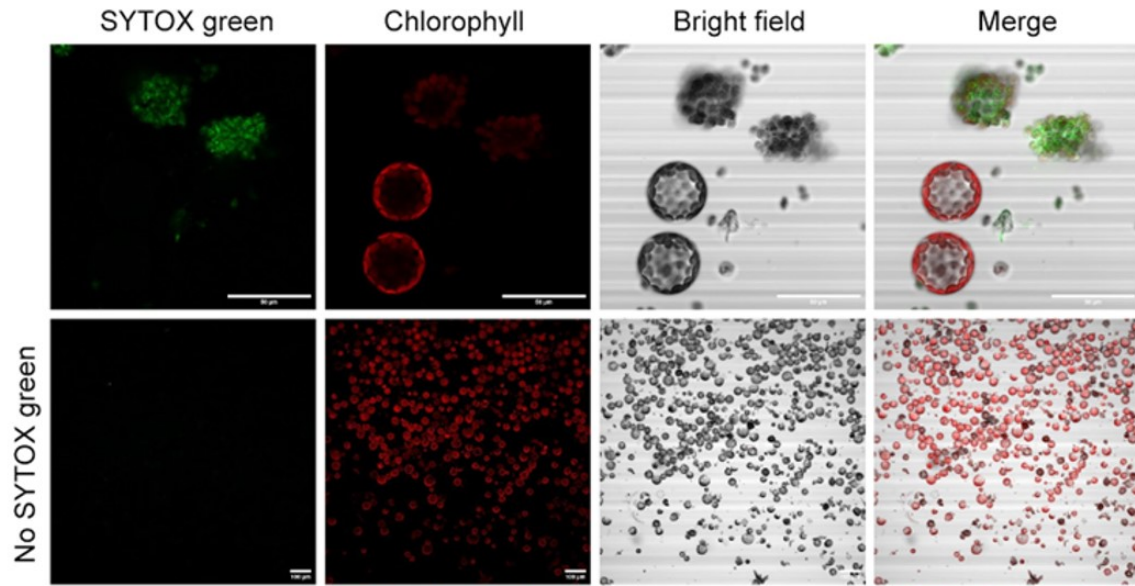

**Figure S3.** Control microscopic analysis of *Arabidopsis* protoplasts. Arabidopsis protoplasts were extracted as indicated in methods, and cell death was evaluated using SYTOX Green stain. The first row shows an amplified image (Scale bar: 50  $\mu\text{m}$ . Row 2 to 5: scale bar = 100  $\mu\text{m}$ ). The second row corresponds to a control sample without SYTOX green, which was needed as a background fluorescence sample. The corresponding channels are indicated at the top of each column.

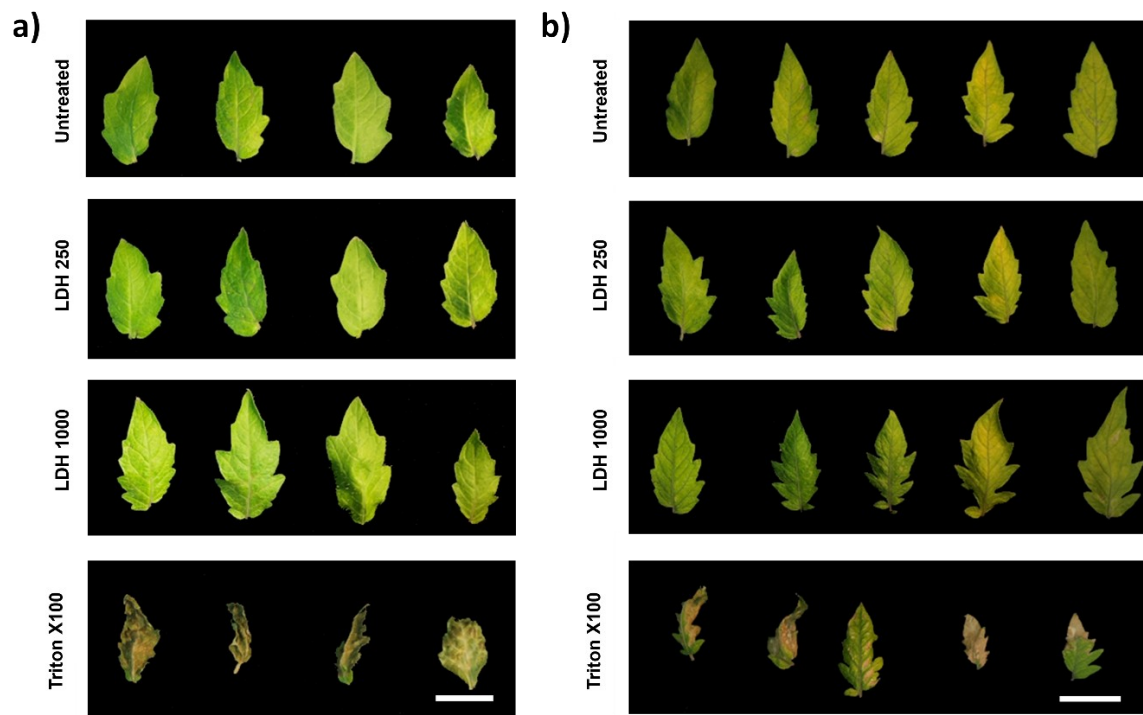

**Figure S4.** Nanoparticles' effect on tomato leaves. Fully expanded leaves from 6-week-old tomatoes A) 'Marmande' and B) Rosade varieties. The leaves were infiltrated with water (mock), 250 ng/ $\mu$ L nanoparticles (LDH 250), 1000 ng/ $\mu$ L nanoparticles (LDH 1000), or Triton X-100. Plants were photo-documented after 48 h—scale bar: 1 cm.

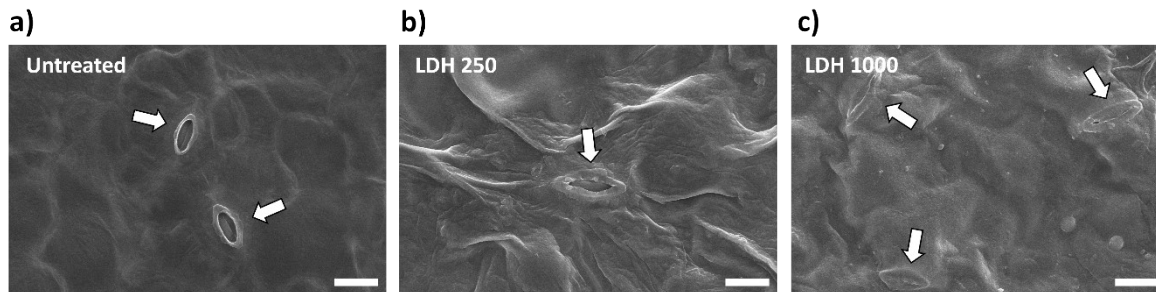

**Figure S5.** SEM images of LDH nanosheets on *A. thaliana* leaves. Leaves were incubated for 48 h with 250 ng/ $\mu$ L (LDH 250) and 1000 ng/ $\mu$ L (LDH 1000). Untreated protoplasts are shown as a negative control. The arrow within the images indicates the stomata location. Scale bars: 10  $\mu$ m.
